# Supplementary material for: Biophysical controls on seasonal changes in the structure, growth, and grazing of the size-fractioned phytoplankton community in the northern South China Sea
Source: Copernicus journal article supplement (doi:10.5194/bg-2021-226), 2021-09-01
Supplement: Supplementary file [file bg-2021-226-AC3-supplement.pdf]

Estimates of nutrient-enriched phytoplankton growth rate ( $\mu_n$ , d<sup>-1</sup>) and microzooplankton grazing rate ( $m$ , d<sup>-1</sup>) for total phytoplankton community (Landry and Hassett, 1982) were calculated with least-square regression between the apparent growth rates ( $\varepsilon_d$ , d<sup>-1</sup>) and the dilution factors ( $d$ ) as

$$\varepsilon_d = \frac{1}{t} \ln \left[ \frac{Chl_d(t)}{Chl_d(0)} \right] = \mu_n - d \cdot m$$

$$\mu_0 = \varepsilon_{raw} + m$$

where,  $Chl_d(0)$  and  $Chl_d(t)$  are the initial and final concentrations of Chl-*a* for each dilution treatment ( $d$ ) with  $t$  the incubation time (one day in our experiment). The natural growth rate ( $\mu_0$ ) is calculated as the sum of the apparent growth rate without nutrient enrichment ( $\varepsilon_{raw}$ ) and the grazing rate (Landry et al., 1993).

For each phytoplankton size-class  $i$  (micro, nano, and pico, respectively), we have similar equations as

$$\varepsilon_d^i = \frac{1}{t} \ln \left[ \frac{Chl_d^i(t)}{Chl_d^i(0)} \right] = \mu_n^i - d \cdot m_i$$

$$\mu_i = \varepsilon_{raw}^i + m_i$$

where,  $\mu_i$  and  $\mu_n^i$  are the natural and nutrient-enriched growth rates of size-class  $i$  with  $m_i$  the size-specific grazing rate.  $\varepsilon_{raw}^i$  and  $\varepsilon_d^i$  are the raw and nutrient-enriched apparent growth rates of size-class  $i$ .
